# Supplementary material for: Erythrocyte–platelet hybrid membranes coating polypyrrol nanoparticles for enhanced delivery and photothermal therapy
Source: Royal Society of Chemistry journal article supplement (doi:10.1039/c8tb02143k), 2018-01-01
Supplement: c8tb02143k1.pdf [file c8tb02143k1.pdf]

## Supporting Information

# Erythrocyte-Platelet Hybrid Membranes Coating Polypyrrol Nanoparticles for Enhanced Delivery and Photothermal Therapy

*Yao Liu, Xuejun Wang, Boshu Ouyang, Xianping Liu, Yang Du, Xuzheng Cai, Huishu*

*Guo,\* Zhiqing Pang,\* Wuli Yang and Shun Shen\**

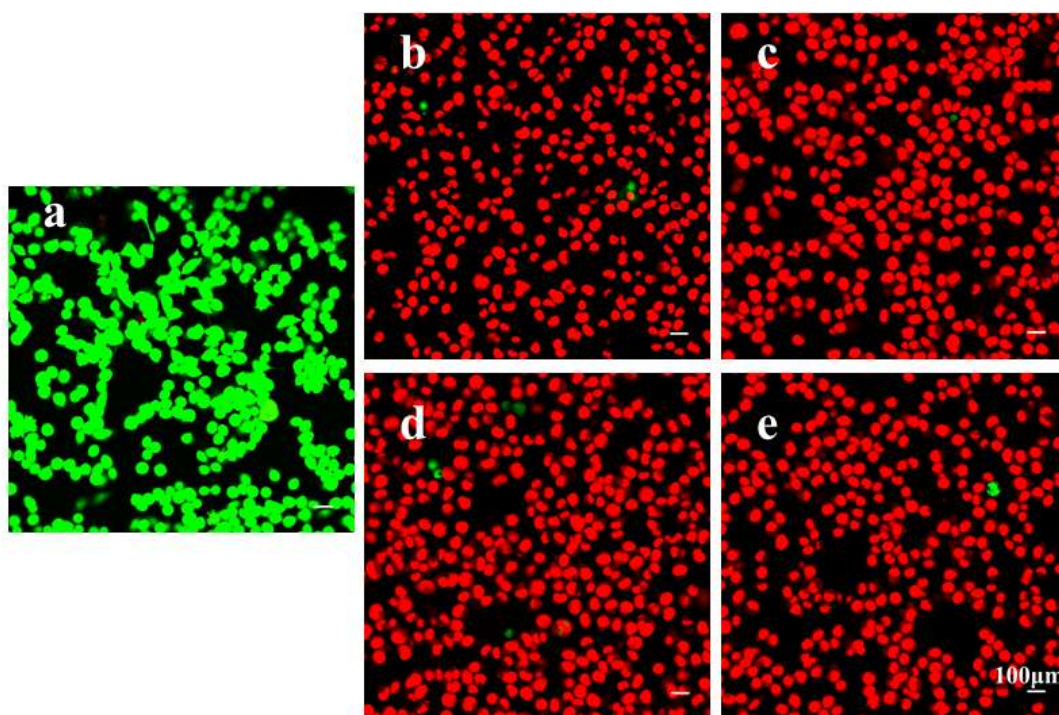

**Fig. S1.** CLSM images of HCT116 cells stained by PI and Calcein-AM after incubation with (a) PBS solution, 40  $\mu\text{g/mL}$  of (b) PPy NPs, (c) PPy@RBC NPs, (d) PPy@PLT NPs and (e) PPy@[R-P] NPs by NIR laser irradiation (808 nm, 1.5  $\text{W/cm}^2$ , 180 s). Scale bar =100  $\mu\text{m}$ .

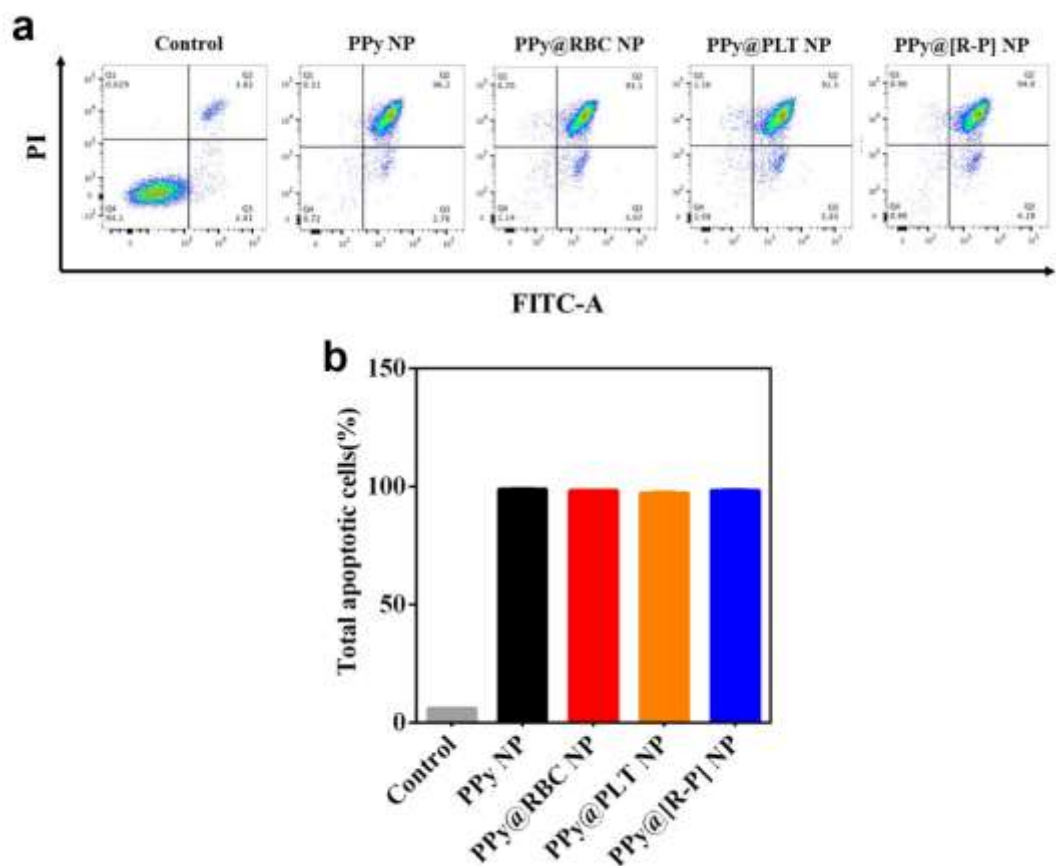

**Fig. S2.** (a) The images of flow cytometry through Annexin-V-FITC/PI co-staining method. The HCT116 cells treated with PPy NPs, PPy@RBC NPs, PPy@PLT NPs and PPy@[R-P] NPs at a concentration of 40  $\mu\text{g/mL}$  by NIR lighting under a power density of 1.5  $\text{W/cm}^2$  for 180 s, respectively. (b) Percentages of total apoptotic cells calculated according to the results of flow cytometry.

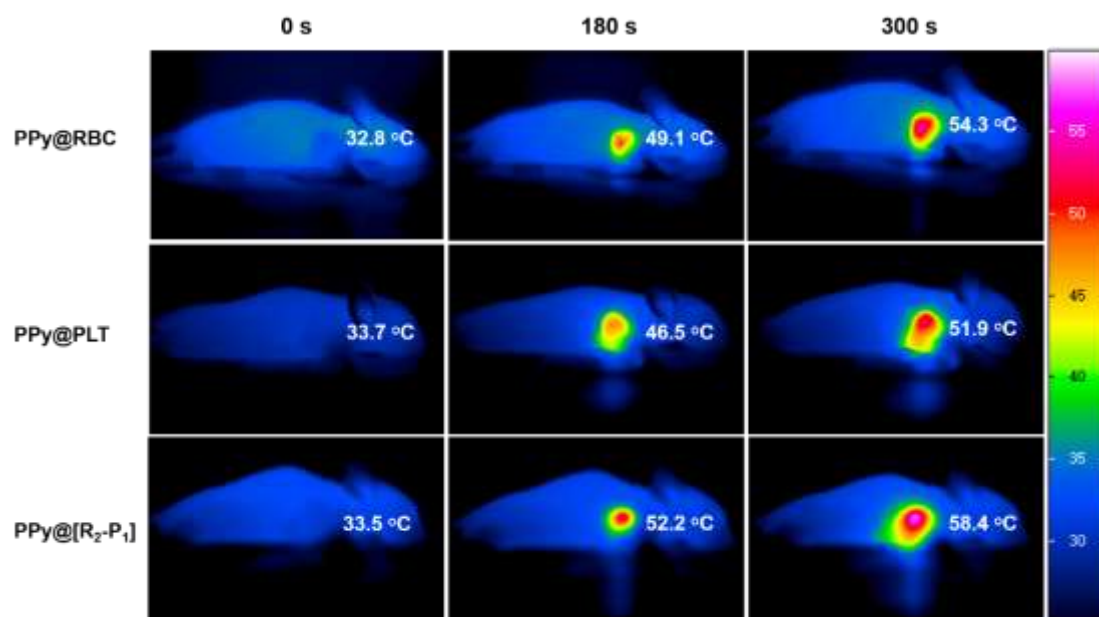

**Fig. S3.** Infrared thermal images of PPy@RBC NPs, PPy@PLT NPs and PPy@[R<sub>2</sub>-P<sub>1</sub>] NPs intravenously injected under the second NIR laser irradiation after 6 hrs at a power density of 1.50 W/cm<sup>2</sup> for 300 s.

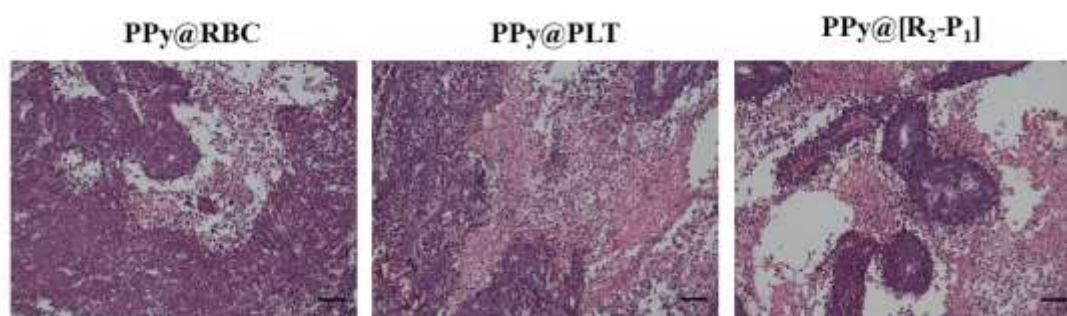

**Fig. S4.** Histological analysis of H&E staining of tumors after treatment by PPy@RBC NPs, PPy@PLT NPs and PPy@[R<sub>2</sub>-P<sub>1</sub>] NPs with NIR laser irradiation.

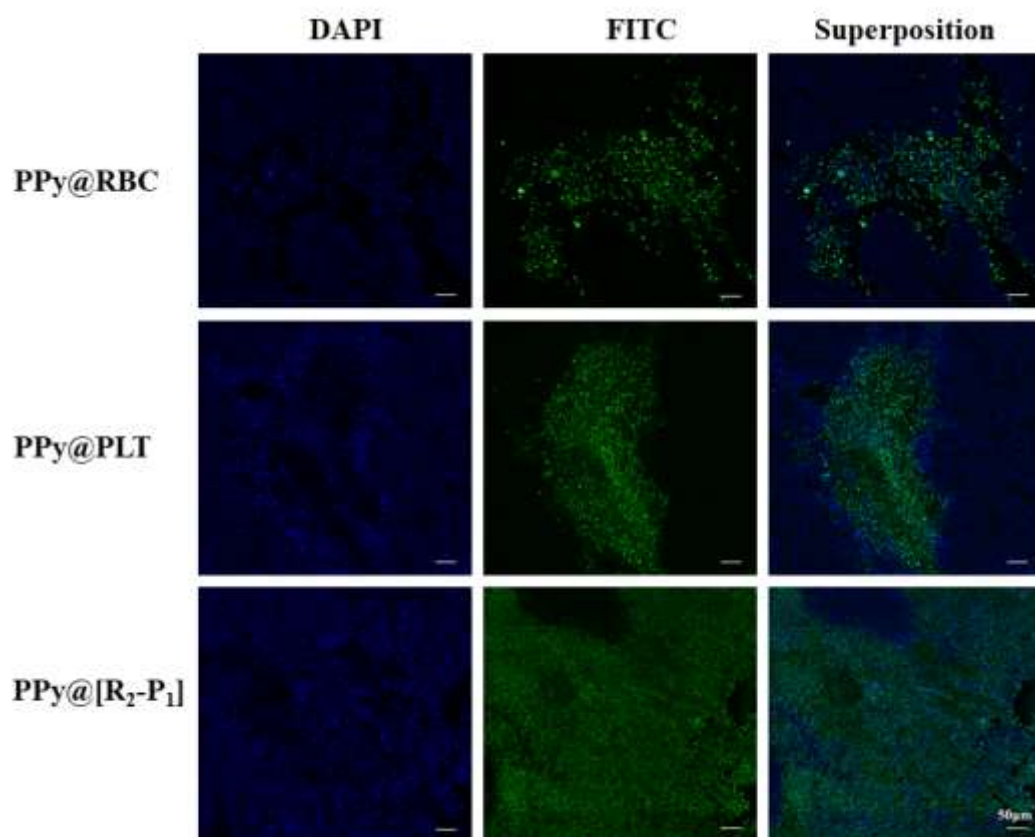

**Fig. S5.** TUNEL sections of tumors after treatment by PPy@RBC NPs, PPy@PLT NPs and PPy@[R<sub>2</sub>-P<sub>1</sub>] NPs with NIR laser irradiation. Bar =50  $\mu$ m.

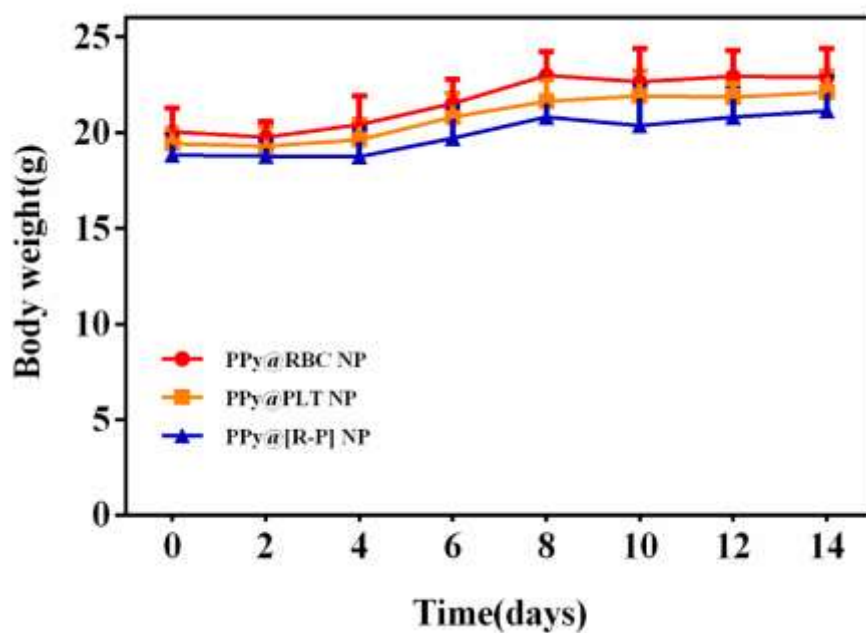

**Fig. S6.** Body weight changes after treatment by PPy@RBC NPs, PPy@PLT NPs and PPy@[R<sub>2</sub>-P<sub>1</sub>] NPs with NIR laser irradiation.

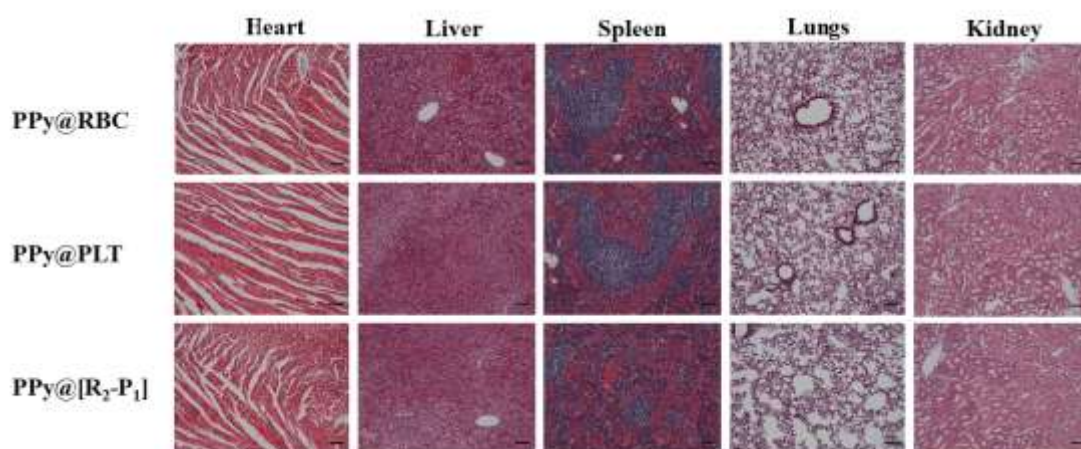

**Fig. S7.** Histological analysis of H&E staining of main organic tissues after PTT by PPy@RBC NPs, PPy@PLT NPs and PPy@[R<sub>2</sub>-P<sub>1</sub>] NPs. Bar=200 μm.
